# Supplementary material for: Economic evaluation of return-to-work interventions for mental disorder-related sickness absence: two years follow-up of a randomized clinical trial
Source: PubMed Central journal article supplement (PMC9524165; doi:10.5271/sjweh.4012), 2022-04-29
Supplement: SJWEH-48-264-S001.pdf [file SJWEH-48-264-S001.pdf]

# Economic evaluation of return-to-work interventions for mental disorder-related sickness absence: two years follow-up of a randomized clinical trial <sup>1</sup>

by Anna Finnes, PhD,<sup>2</sup> Jeffrey S Hoch, PhD, Pia Enebrink, PhD, JoAnne Dahl, PhD, Ata Ghaderi, PhD, Anna Nager, PhD, Inna Feldman, PhD

1. *Supplementary material*
2. *Correspondence to: Anna Finnes, Division of Psychology, Department of Clinical Neuroscience, Karolinska Institutet, Nobels väg 9, 171 77 Stockholm, Sweden. [E-mail: anna.finnes@ki.se]*

Supplement Content:

Table S1. Unit costs/visit, in Euro 2020

Table S2: Missing data (%) for the frequencies of health care visits

Supplementary Methods: Regression calculations for cost-effectiveness analyses

Figure S1-2. Bootstrapped results basecase analysis per intervention group 1 year and 2 years.

Figure S3-4. Bootstrapped results per intervention group for the subgroup analysis depression or anxiety disorders 1 year and 2 years.

Figure S5-6. Bootstrapped results per intervention group for the subgroup analysis stress-induced exhaustion disorder 1 year and 2 years.

Table S3. Mean differences in costs overall between treatment arms.

Figure S7. Cost-effectiveness acceptability curves for ACT, WDI, ACD+WDI compared with TAU over one- and two years follow-up for overall cost.

Figure S8. Cost-effectiveness acceptability curves for ACT, WDI, ACD+WDI compared with TAU over one- and two years follow-up for patients with depression or anxiety and with stress-induced exhaustion disorder for overall cost.

---

**Table S1. Unit costs/visit, in Euro 2020**

| <b>Professional</b> | <b>Costs</b> |
|---------------------|--------------|
| Medical doctor      | 389          |
| Psychologist        | 275          |
| Social worker       | 190          |
| Physical therapist  | 137          |
| Nurse               | 282          |

**Table S2: Missing data (%) for the frequencies of health care visits to different professionals at all follow-up measurements**

|                | Frequencies of health care visits to: |              |               |                    |       |
|----------------|---------------------------------------|--------------|---------------|--------------------|-------|
|                | Medical doctor                        | Psychologist | Social worker | Physical therapist | Nurse |
| Post-treatment | 20%                                   | 25%          | 22%           | 26%                | 22%   |
| 6-month FU     | 15%                                   | 10%          | 8%            | 9%                 | 9%    |
| 12 -month FU   | 11%                                   | 5%           | 2%            | 4%                 | 2%    |
| 24-month FU    | 17%                                   | 17%          | 17%           | 17%                | 17%   |

### Regression calculations for cost-effectiveness analyses

Regression calculations were adjusted for the following covariates as: age, sex, education level, birthplace, previous grade of SA absence and marital status. Denoting these covariates as  $X$  and the treatment options as ACT, WDI, and ACT&WDI, the regression analysis estimated the coefficients for equations [1] and [2]

$$\text{Cost} = \alpha_0 + \alpha_{\text{ACT}} \text{ACT} + \alpha_{\text{WDI}} \text{WDI} + \alpha_{\text{ACT\&WDI}} \text{ACT\&WDI} + \alpha_X \mathbf{X} \quad [1]$$

$$\text{NDSA} = \beta_0 + \beta_{\text{ACT}} \text{ACT} + \beta_{\text{WDI}} \text{WDI} + \beta_{\text{ACT\&WDI}} \text{ACT\&WDI} + \beta_X \mathbf{X} \quad [2]$$

where the coefficient estimates of  $\alpha_t$  and  $\beta_t$  equal the extra cost ( $\Delta C$ ) and extra effect ( $\Delta E$ ) estimates comparing treatment  $t$  to TAU (for  $t = \text{ACT}, \text{WDI}, \text{and ACT+WDI}$ ).

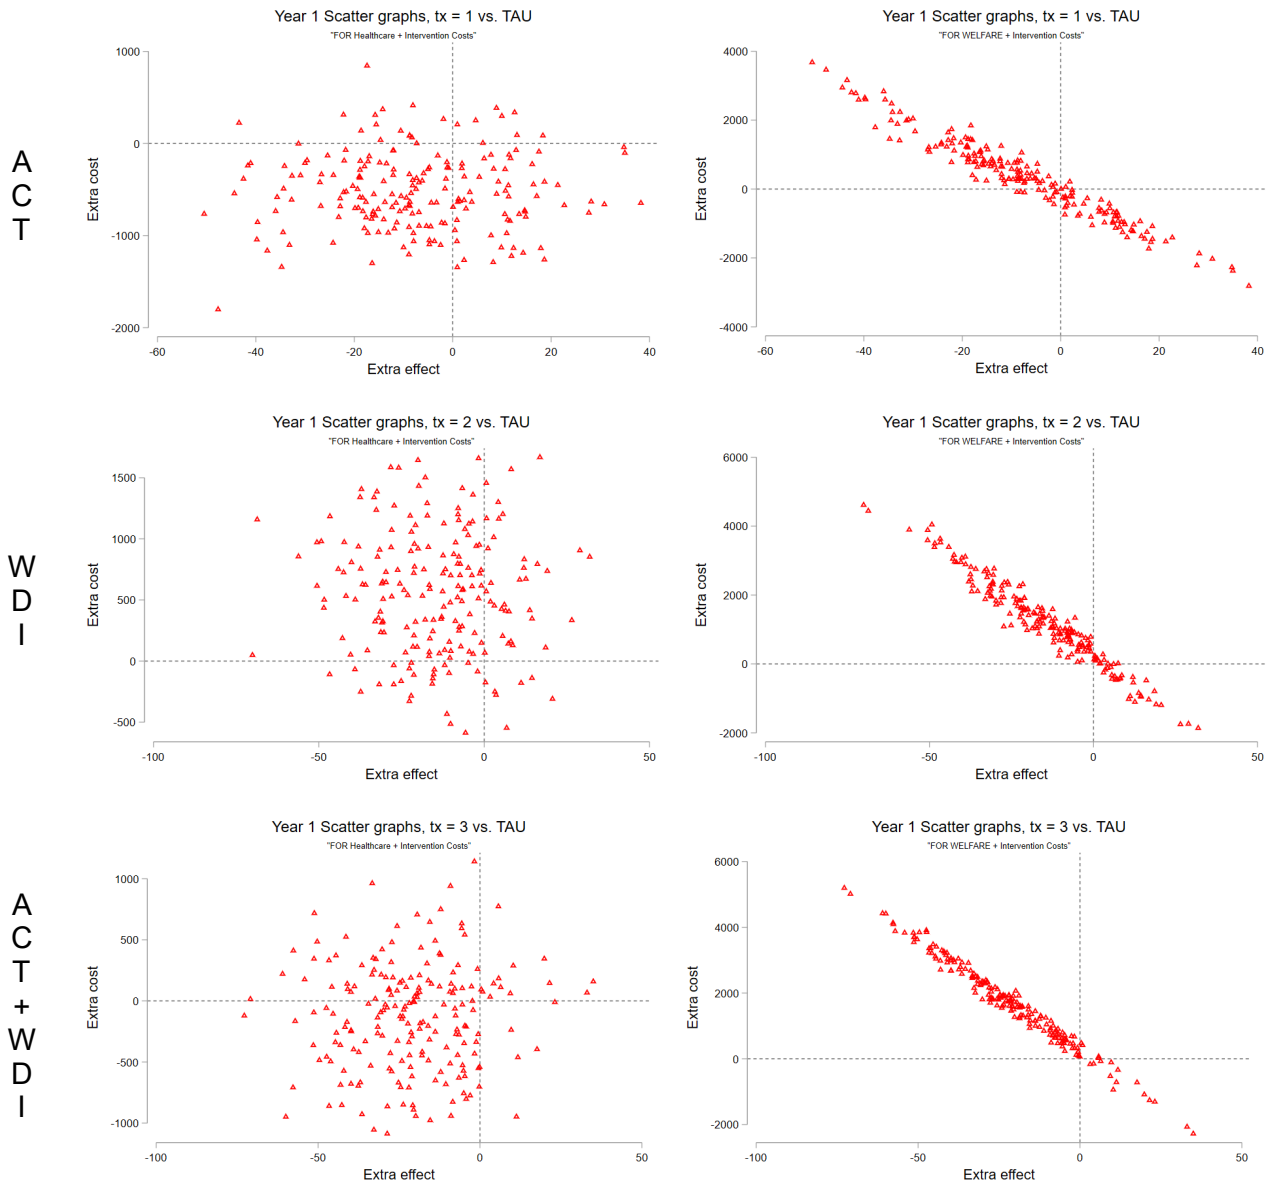

**Figure S1.** Cost-effectiveness planes for year 1 including all participants (n=264). The health perspective is presented to the right and the welfare perspective to the left for each treatment arm compared to TAU.

A  
C  
T

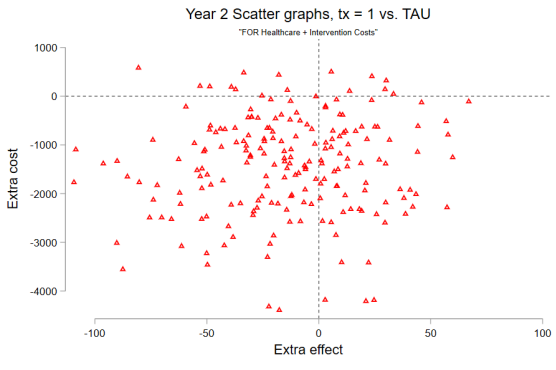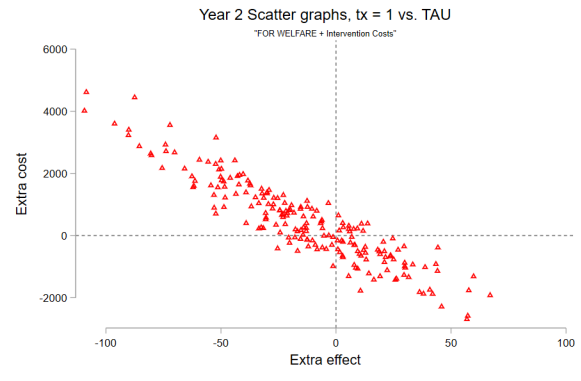

W  
D  
I

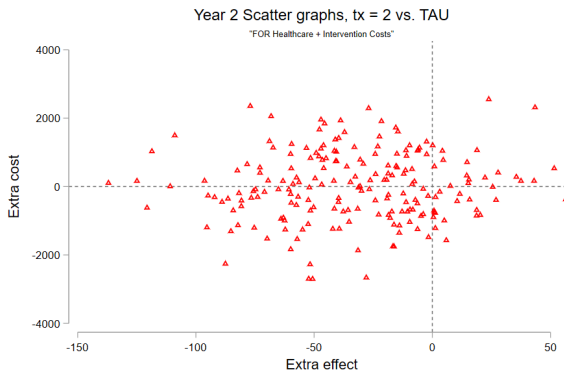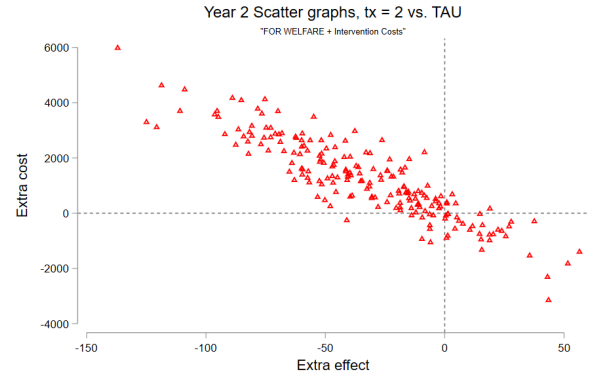

A  
C  
T  
+  
W  
D  
I

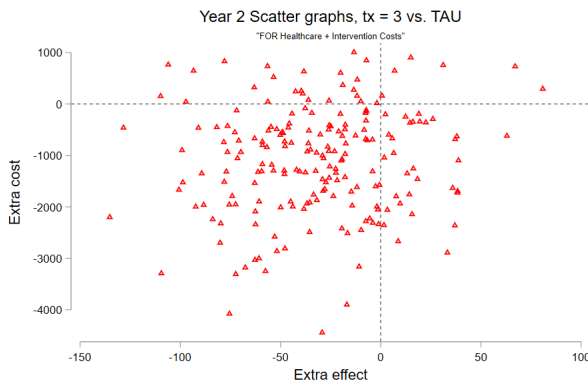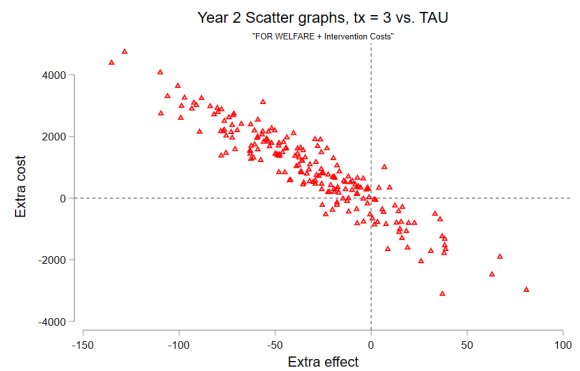

**Figure S2.** Cost-effectiveness planes for year 2 including all participants (n=264). The health perspective is presented to the right and the welfare perspective to the left for each treatment arm compared to TAU.

A  
C  
T

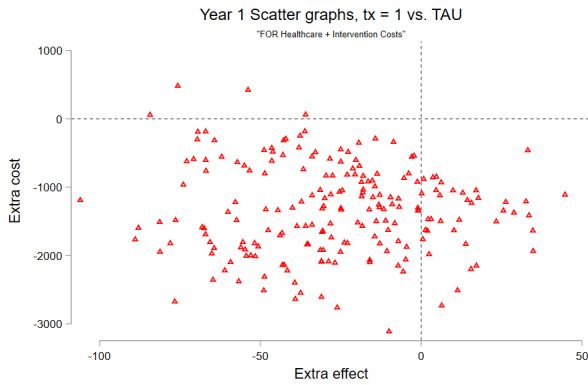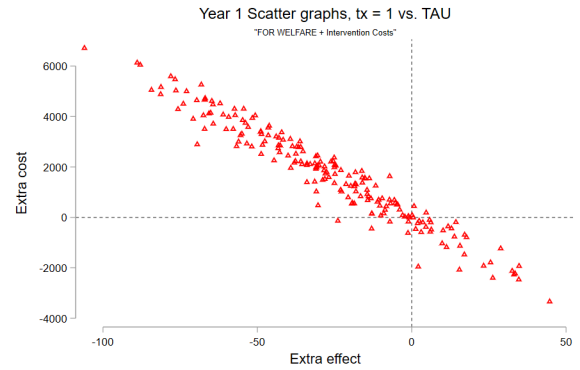

W  
D  
I

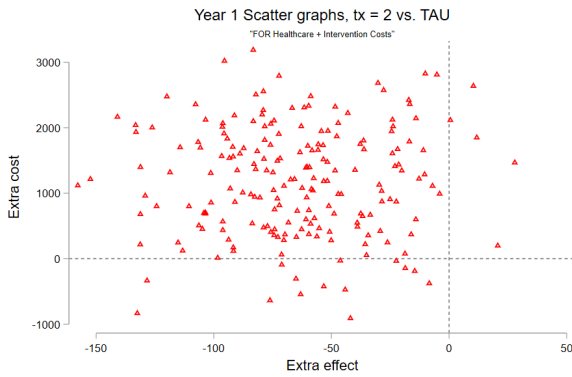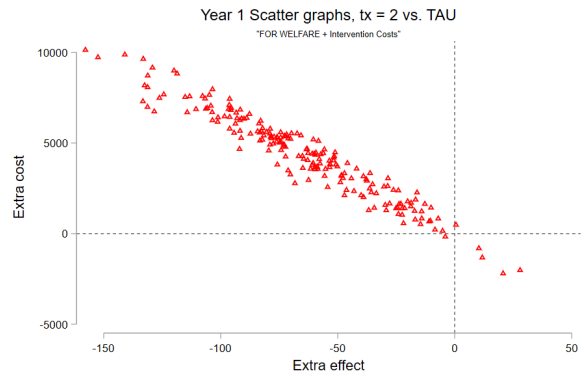

A  
C  
T  
+  
W  
D  
I

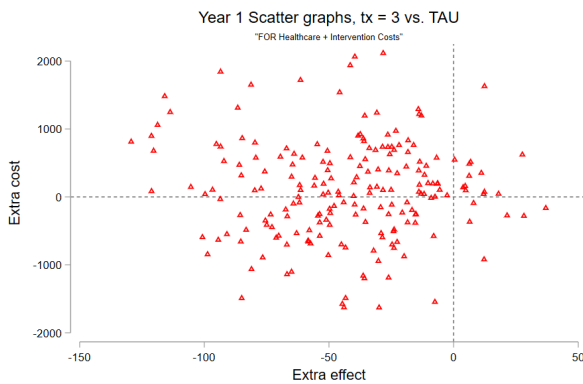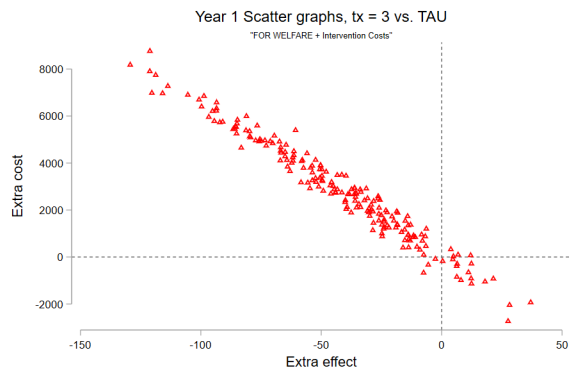

**Figure S3.** Cost-effectiveness planes for year 1 including participants with depression or anxiety disorders (n=107). The health perspective is presented to the right and the welfare perspective to the left for each treatment arm compared to TAU.

A  
C  
T

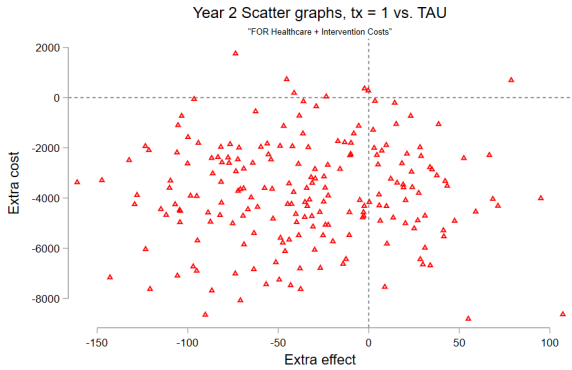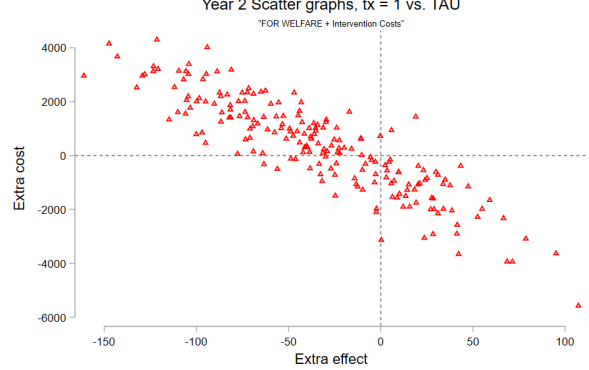

W  
D  
I

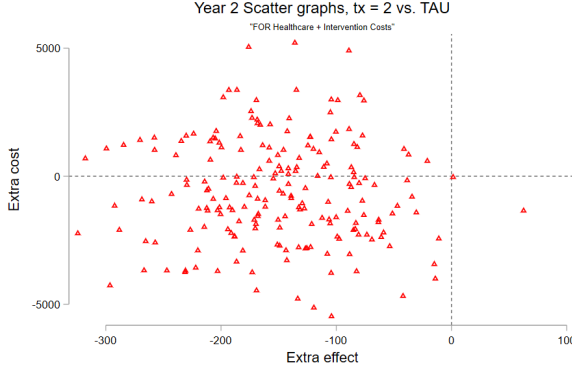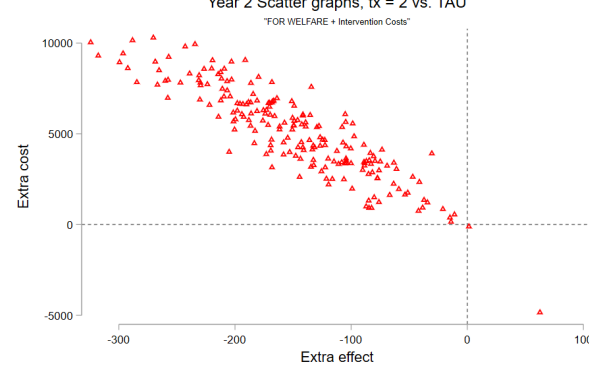

A  
C  
T  
+  
W  
D  
I

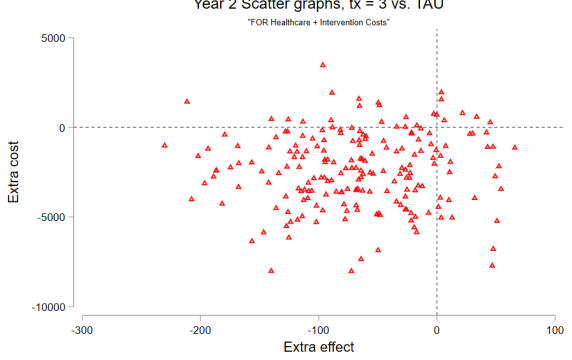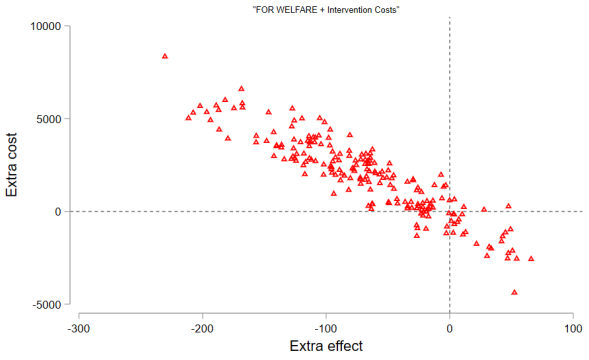

**Figure S4.** Cost-effectiveness planes for year 2 including participants with depression or anxiety disorders (n=107). The health perspective is presented to the right and the welfare perspective to the left for each treatment arm compared to TAU.

A  
C  
T

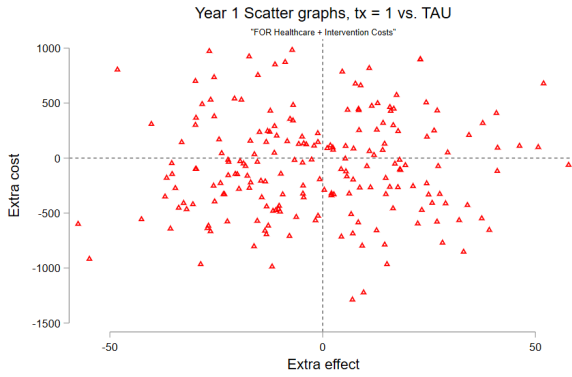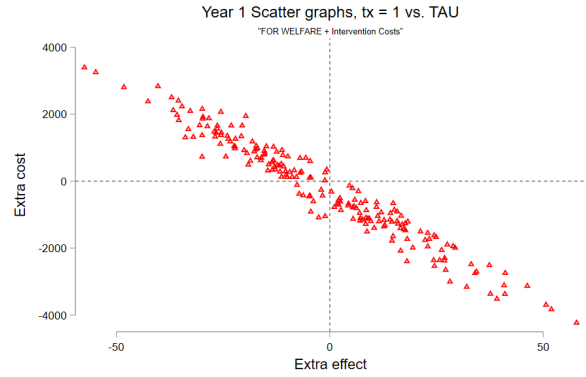

W  
D  
I

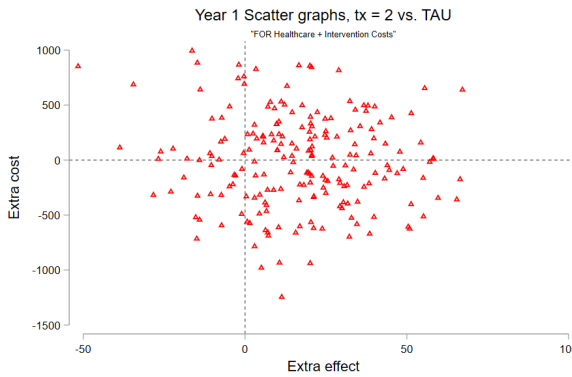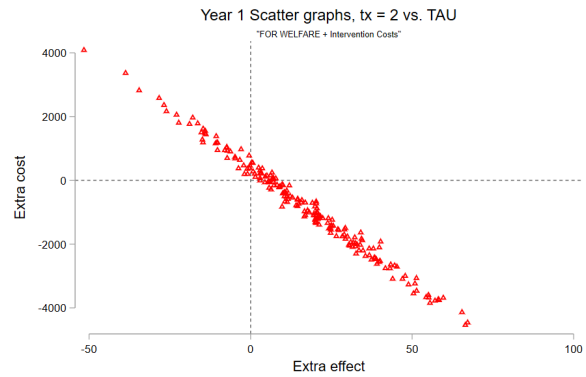

A  
C  
T  
+  
W  
D  
I

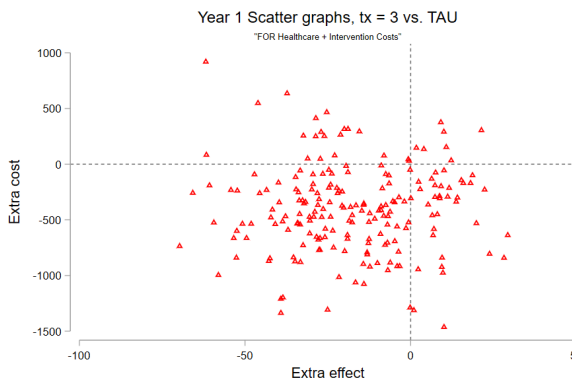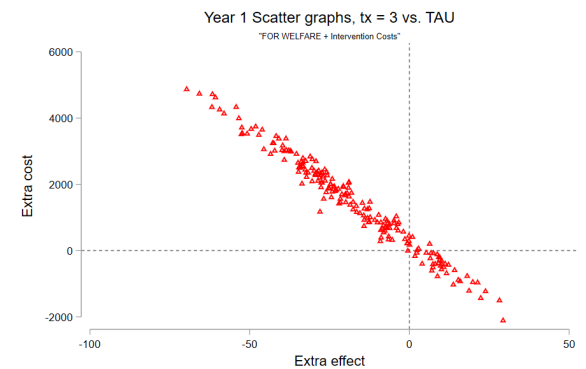

**Figure S5.** Cost-effectiveness planes for year 1 including participants with stress-induced exhaustion disorder (n=157). The health perspective is presented to the right and the welfare perspective to the left for each treatment arm compared to TAU.

A  
C  
T

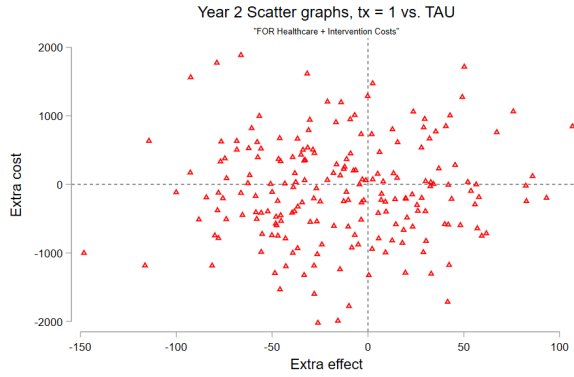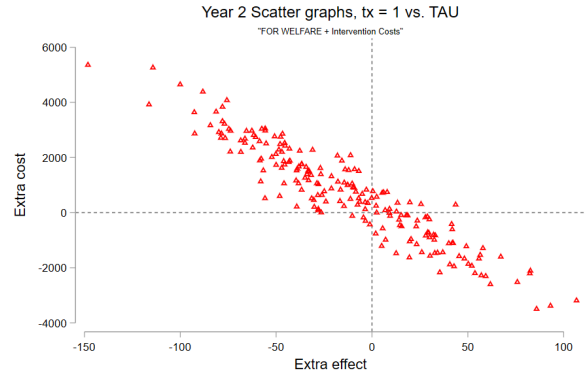

W  
D  
I

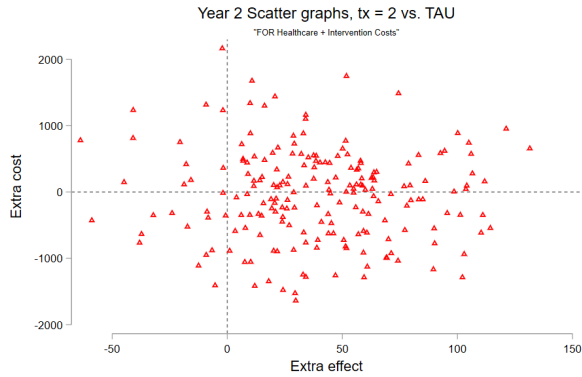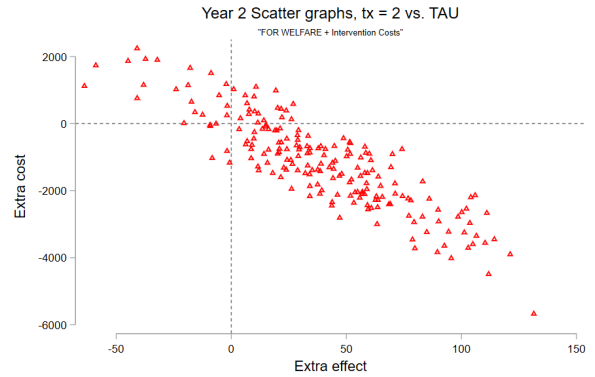

A  
C  
T  
+  
W  
D  
I

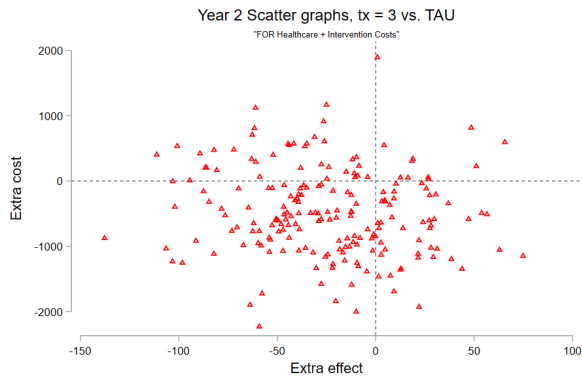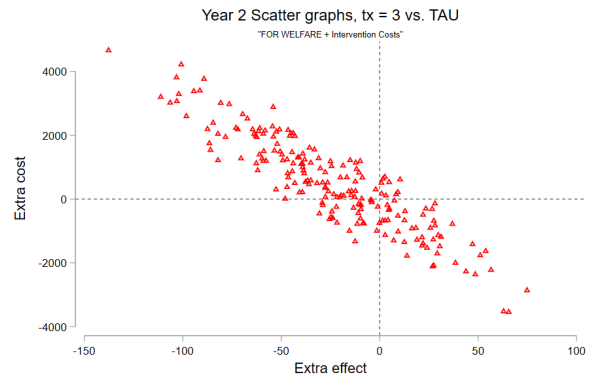

**Figure S6.** Cost-effectiveness planes for year 2 including participants with stress-induced exhaustion disorder (n=157). The health perspective is presented to the right and the welfare perspective to the left for each treatment arm compared to TAU.



**Table S3.** Mean differences in costs overall (in €2020) between treatment arms.

| Time horizon                                                        | ACT vs TAU                 | WDI vs TAU                            | ACT+WDI vs TAU              |
|---------------------------------------------------------------------|----------------------------|---------------------------------------|-----------------------------|
|                                                                     | Estimate (95% CI)          | Estimate (95% CI)                     | Estimate (95% CI)           |
| <b>All participants, n=264</b>                                      |                            |                                       |                             |
| Total cost 1 year                                                   | -423.04 (-2797.40–2081.58) | 1275.95 (-1370.74–4202.75)            | 1112.67 (-1770.08–3463.33)  |
| Total cost 2 year                                                   | 44.34 (-4581.59–1773.43)   | 1706.776 (-2178.34–4137.29)           | 1450.44 (-4053.96–2644.72)  |
| <b>Participants with depression or anxiety disorder, n=107</b>      |                            |                                       |                             |
| Total cost 1 year                                                   | -372.58 (-3989.36–4080.86) | 4439.41 <sup>a</sup> (166.81–9789.97) | 1961.72 (-2485.70–7796.48)  |
| Total cost 2 year                                                   | -624.61 (-8548.14–1330.09) | 6823.10 (-3286.88–9641.76)            | 1,676.33 (-7174.76–4369.68) |
| <b>Participants with stress-induced exhaustion disorder, n= 157</b> |                            |                                       |                             |
| Total cost 1 year                                                   | -730.17 (-3893.42–2069.29) | -1287.88 (-4387.09–1904.95)           | 282.72 (-2317.98–3478.00)   |
| Total cost 2 year                                                   | 10.19 (-3218.56–4061.16)   | -2371.09 (-4692.58–1658.97)           | 1158.58 (-3850.64–2526.08)  |

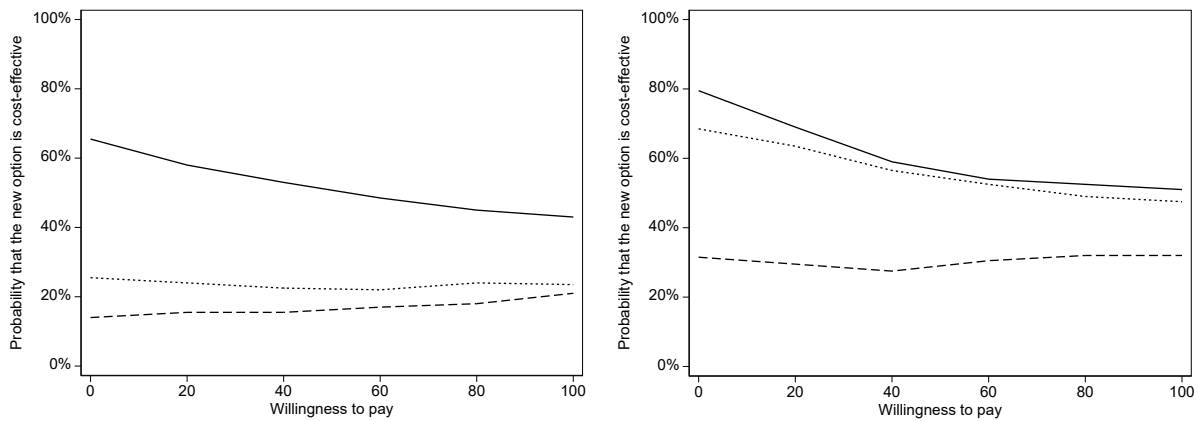

**Figure S7.** Cost-effectiveness acceptability curves for ACT, WDI, ACD+WDI compared with TAU over one- and two years follow-up. ACT – solid line, WDI - dashed line, ACT+WDI - dotted line.

### Patients with a diagnosis of depression or anxiety

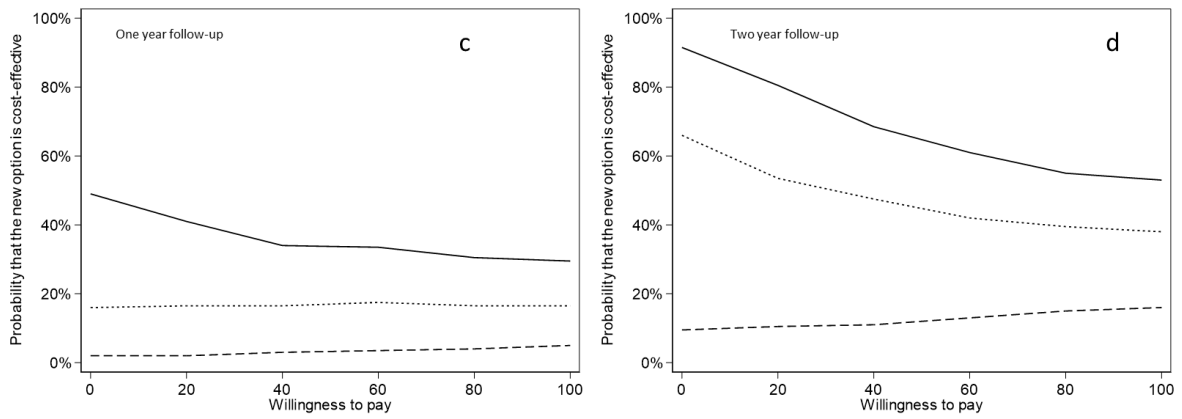

### Patients with stress-induced exhaustion disorder

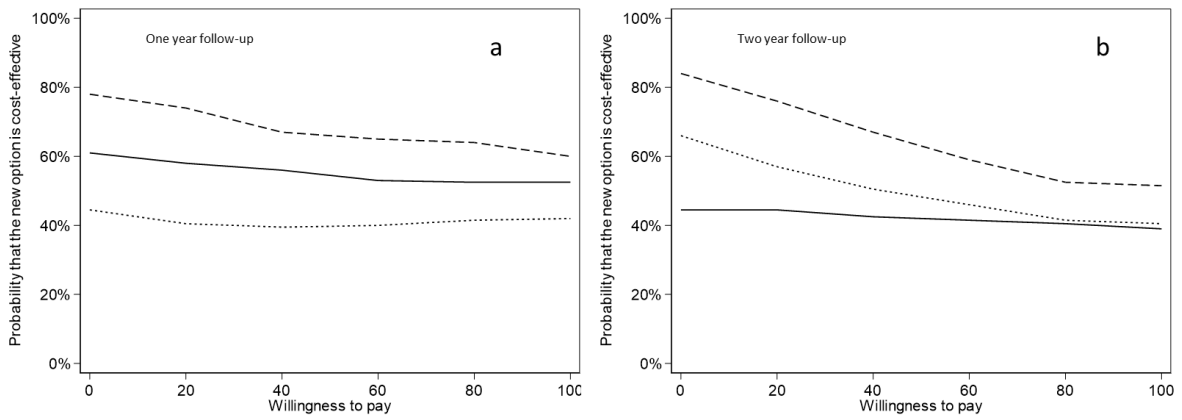

**Figure S8.** Cost-effectiveness acceptability curves for ACT, WDI, ACD+WDI compared with TAU over one- and two years follow-up for patients with depression or anxiety (c, d) and with stress-induced exhaustion disorder (a, b). ACT – solid line, WDI - dashed line, ACT+WDI - dotted line.
